# Supplementary material for: Evaluating the safety of high-intensity focused ultrasound treatment for rectal endometriosis: results from a French prospective multicentre study including 60 patients
Source: PubMed Central journal article supplement — Hum Reprod. 2024 Jun 24;39(8):1673–83. doi: 10.1093/humrep/deae127 (PMC11291952; doi:10.1093/humrep/deae127), 2024-06-24
Supplement: deae127_supplementary_figure_s1.pdf [file deae127_supplementary_figure_s1.pdf]

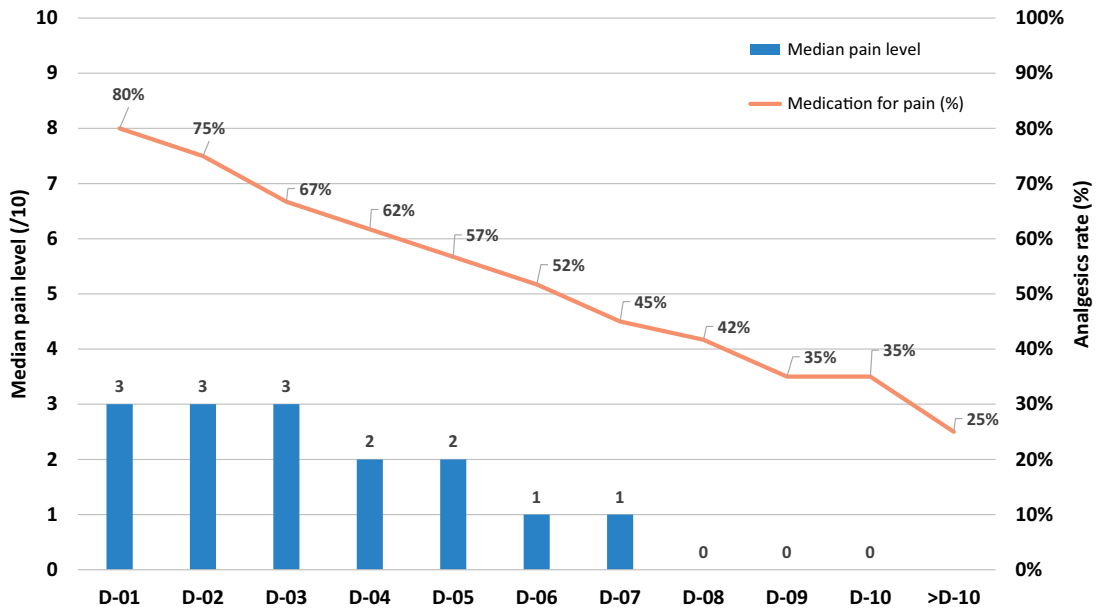

Supplementary Figure S1. Daily pain levels and proportion of patients using analgesics during the first 10 days post-treatment.
