# Supplementary material for: Evaluating the safety of high-intensity focused ultrasound treatment for rectal endometriosis: results from a French prospective multicentre study including 60 patients
Source: PubMed Central journal article supplement — Hum Reprod. 2024 Jun 24;39(8):1673–83. doi: 10.1093/humrep/deae127 (PMC11291952; doi:10.1093/humrep/deae127), 2024-06-24
Supplement: deae127_supplementary_table_s1.pdf [file deae127_supplementary_table_s1.pdf]

**Supplementary Table S1.** ENZIAN classification based on MRI endometriosis lesions.

|                                                             | <b>None</b> | <b>&lt;3 cm</b> | <b>3–7 cm</b> | <b>&gt;7 cm</b> |
|-------------------------------------------------------------|-------------|-----------------|---------------|-----------------|
| <b>Ovary</b>                                                |             |                 |               |                 |
| Right                                                       | 56 (93.3)   | 3 (11.7)        | 0 (0.0)       | 1 (1.7)         |
| Left                                                        | 48 (80.0)   | 8 (13.3)        | 4 (6.7)       | 0 (0.0)         |
| <b>Deep endometriosis</b>                                   | <b>None</b> | <b>&lt;1 cm</b> | <b>1–3 cm</b> | <b>&gt;3 cm</b> |
| <b>A:</b> Rectovaginal space Vagina Retro cervical area     | 4 (6.7)     | 7 (11.7)        | 39 (65.0)     | 10 (16.7)       |
| <b>B:</b> Sacro uterine/cardinal ligaments Pelvic side wall | 4 (6.7)     | 25 (41.7)       | 25 (41.7)     | 6 (10.0)        |
| <b>C :</b> Rectum                                           | 0 (0.0)     | 4 (6.7)         | 40 (6.7)      | 16 (26.7)       |
|                                                             | <b>No</b>   | <b>Yes</b>      | <b>NA</b>     |                 |
| <b>FA:</b> Adenomyosis (Internal)                           | 52 (86.7)   | 7 (11.7)        | 1 (1.7)       |                 |
| <b>FB:</b> Bladder                                          | 59 (98.3)   | 1 (1.7)         |               |                 |
| <b>FU:</b> Ureter                                           | 60 (100.0)  | 0 (0.0)         |               |                 |
| <b>FI:</b> Intestine                                        | 60 (100.0)  | 0 (0.0)         |               |                 |
