# Supplementary material for: Evaluating the safety of high-intensity focused ultrasound treatment for rectal endometriosis: results from a French prospective multicentre study including 60 patients
Source: PubMed Central journal article supplement — Hum Reprod. 2024 Jun 24;39(8):1673–83. doi: 10.1093/humrep/deae127 (PMC11291952; doi:10.1093/humrep/deae127), 2024-06-24
Supplement: deae127_supplementary_table_s2.pdf [file deae127_supplementary_table_s2.pdf]

Supplementary Table S2. Evolution of urinary symptoms—paired results.

|                             | Mean ± SD  | [IQR]     | (95%CI)      |
|-----------------------------|------------|-----------|--------------|
| Dysuria                     |            |           |              |
| Pre-op                      | 0.6 ± 1.8  | [0; 0]    | (0.1; 1.1)   |
| Six months                  | 0.5 ± 1.8  | [0; 0]    | (0.0; 1.0)   |
| Difference                  | −0.1 ± 1.4 | [0; 0]    | (−0.5; 0.3)  |
| P-value                     | 0.611      |           |              |
| Urinary urgency             |            |           |              |
| Pre-op                      | 1.8 ± 3.0  | [0; 5]    | (1.0; 2.6)   |
| Six months                  | 1.1 ± 2.5  | [0; 0]    | (0.4; 1.7)   |
| Difference                  | −0.8 ± 2.7 | [−0.3; 0] | (−1.5; −0.0) |
| P-value                     | 0.026      |           |              |
| Urge incontinence           |            |           |              |
| Pre-op                      | 0.5 ± 1.4  | [0; 0]    | (0.1; 0.9)   |
| Six months                  | 0.4 ± 1.5  | [0; 0]    | (0.1; 0.8)   |
| Difference                  | −0.1 ± 1.6 | [0; 0]    | (−0.5; 0.3)  |
| P-value                     | 0.77       |           |              |
| Stress incontinence         |            |           |              |
| Pre-op                      | 0.9 ± 2.0  | [0; 0]    | (0.4; 1.4)   |
| Six months                  | 0.8 ± 1.8  | [0; 0]    | (0.3; 1.2)   |
| Difference                  | −0.1 ± 2.1 | [0; 0]    | (−0.7; 0.4)  |
| P-value                     | 0.62       |           |              |
| Incomplete bladder emptying |            |           |              |
| Pre-op                      | 2.0 ± 2.8  | [0; 5]    | (1.3; 2.7)   |
| Six months                  | 1.2 ± 2.4  | [0; 2]    | (0.6; 1.9)   |
| Difference                  | −0.8 ± 2.4 | [−1.3; 0] | (−1.4; −0.1) |
| P-value                     | 0.012      |           |              |
