# Supplementary material for: Evaluating the safety of high-intensity focused ultrasound treatment for rectal endometriosis: results from a French prospective multicentre study including 60 patients
Source: PubMed Central journal article supplement — Hum Reprod. 2024 Jun 24;39(8):1673–83. doi: 10.1093/humrep/deae127 (PMC11291952; doi:10.1093/humrep/deae127), 2024-06-24
Supplement: deae127_supplementary_table_s3.pdf [file deae127_supplementary_table_s3.pdf]

Supplementary Table S3. Evolution of sexual function (FSFI scores)—paired results (N = 58).

|                           | Score, mean ± SD<br>(median) [range] | Difference from baseline,<br>mean ± SD | % Change from baseline,<br>mean ± SD [N]* | P-value |
|---------------------------|--------------------------------------|----------------------------------------|-------------------------------------------|---------|
| <b>Desire score</b>       |                                      |                                        |                                           |         |
| Pre-op                    | 3.3 ± 1.3 (3.0) [1.2–6]              | –                                      | –                                         | –       |
| One month                 | 3.3 ± 1.5 (3.6) [1.2–6]              | 0.01 ± 1.00                            | 1.7 ± 32.5 [58]                           | 0.977   |
| Three months              | 3.6 ± 1.4 (3.6) [1.2–6]              | 0.24 ± 0.95                            | 11.8 ± 31.0 [58]                          | 0.017   |
| Six months                | 3.7 ± 1.4 (3.6) [1.2–6]              | 0.37 ± 1.11                            | 19.2 ± 47.9 [58]                          | 0.001   |
| <b>Arousal score</b>      |                                      |                                        |                                           |         |
| Pre-op                    | 3.3 ± 1.8 (4.1) [0.3–6]              | –                                      | –                                         | –       |
| One month                 | 3.2 ± 2.1 (3.8) [0.3–6]              | –0.10 ± 1.51                           | 10.0 ± 84.5 [58]                          | 0.776   |
| Three months              | 3.6 ± 2.0 (4.4) [0.3–6]              | 0.37 ± 1.06                            | 32.7 ± 109 [58]                           | 0.007   |
| Six months                | 3.5 ± 2.0 (3.9) [0.3–6]              | 0.26 ± 1.51                            | 53.1 ± 200 [58]                           | 0.045   |
| <b>Lubrication score</b>  |                                      |                                        |                                           |         |
| Pre-op                    | 4.7 ± 1.3 (5.1) [1.2–6]              | –                                      | –                                         | –       |
| One month                 | 5.0 ± 1.2 (5.4) [1.2–6]              | 0.23 ± 0.64                            | 5.6 ± 15.6 [36]                           | 0.048   |
| Three months              | 5.0 ± 1.1 (5.4) [1.8–6]              | 0.30 ± 0.70                            | 8.4 ± 21.3 [41]                           | 0.017   |
| Six months                | 4.9 ± 1.3 (5.4) [1.5–6]              | 0.23 ± 0.69                            | 5.5 ± 19.8 [37]                           | 0.054   |
| <b>Orgasm score</b>       |                                      |                                        |                                           |         |
| Pre-op                    | 4.4 ± 1.3 (4.6) [1.2–6]              | –                                      | –                                         | –       |
| One month                 | 4.7 ± 1.3 (4.8) [1.2–6]              | 0.50 ± 0.68                            | 14.2 ± 18.9 [36]                          | <0.001  |
| Three months              | 4.7 ± 1.2 (4.8) [2.0–6]              | 0.26 ± 0.92                            | 9.8 ± 32.3 [41]                           | 0.050   |
| Six months                | 4.6 ± 1.3 (4.8) [1.6–6]              | 0.30 ± 0.76                            | 9.2 ± 22.9 [37]                           | 0.023   |
| <b>Satisfaction score</b> |                                      |                                        |                                           |         |
| Pre-op                    | 4.9 ± 1.0 (5.2) [2.4–6]              | –                                      | –                                         | –       |
| One month                 | 4.9 ± 1.3 (5.6) [1.2–6]              | 0.12 ± 0.80                            | 2.7 ± 22.0 [36]                           | 0.454   |
| Three months              | 5.1 ± 1.0 (5.6) [2.8–6]              | 0.26 ± 0.90                            | 7.2 ± 21.4 [41]                           | 0.051   |
| Six months                | 5.0 ± 1.0 (5.2) [2.4–6]              | 0.25 ± 0.73                            | 6.6 ± 15.8 [37]                           | 0.075   |
| <b>Pain score</b>         |                                      |                                        |                                           |         |
| Pre-op                    | 3.7 ± 0.7 (3.6) [2.4–4.8]            | –                                      | –                                         | –       |
| One month                 | 3.5 ± 0.7 (3.2) [2.4–5.2]            | –0.31 ± 0.68                           | –7.2 ± 16.5 [36]                          | 0.010   |
| Three months              | 3.4 ± 0.6 (3.2) [2.8–4.8]            | –0.35 ± 0.68                           | –7.4 ± 18.1 [41]                          | 0.003   |
| Six months                | 3.5 ± 0.6 (3.2) [2.8–4.8]            | –0.24 ± 0.65                           | –4.7 ± 16.7 [37]                          | 0.055   |
| <b>Total score</b>        |                                      |                                        |                                           |         |
| Pre-op                    | 19.4 ± 10.9 (24.0) [1.5–32.5]        | –                                      | –                                         | –       |
| One month                 | 18.6 ± 12.0 (23.8) [1.5–33.3]        | –0.81 ± 8.85                           | 17.3 ± 116 [58]                           | 0.494   |
| Three months              | 21.3 ± 10.7 (25.3) [1.5–32.8]        | 1.89 ± 5.68                            | 43.4 ± 149 [58]                           | 0.002   |
| Six months                | 20.6 ± 11.3 (27.7) [1.5–33.2]        | 1.13 ± 9.6                             | 73.7 ± 272 [58]                           | 0.010   |
