# Supplementary material for: Evaluating the safety of high-intensity focused ultrasound treatment for rectal endometriosis: results from a French prospective multicentre study including 60 patients
Source: PubMed Central journal article supplement — Hum Reprod. 2024 Jun 24;39(8):1673–83. doi: 10.1093/humrep/deae127 (PMC11291952; doi:10.1093/humrep/deae127), 2024-06-24
Supplement: deae127_supplementary_table_s4.pdf [file deae127_supplementary_table_s4.pdf]

Supplementary Table S4. Evolution of anal continence (Wexner)—paired results (N = 58).

|                                                                          | Score, mean ± SD<br>(Median) [Range] | Difference from baseline,<br>mean ± SD | % Change from baseline,<br>mean ± SD [N]* | P-value |
|--------------------------------------------------------------------------|--------------------------------------|----------------------------------------|-------------------------------------------|---------|
| Q01—Do you ever have uncontrolled anal leakage of gas?                   |                                      |                                        |                                           |         |
| Pre-op                                                                   | 1.47 ± 1.44 (1.0) [0–4]              | –                                      | –                                         | –       |
| One month                                                                | 1.05 ± 1.37 (0.0) [0–4]              | –0.41 ± 1.33                           | –16.7 ± 91 [36]                           | 0.020   |
| Three months                                                             | 0.93 ± 1.28 (0.0) [0–4]              | –0.53 ± 1.52                           | –29.6 ± 87 [36]                           | 0.010   |
| Six months                                                               | 1.03 ± 1.18 (1.0) [0–4]              | –0.43 ± 1.44                           | –22.5 ± 85 [36]                           | 0.034   |
| Q02—Do you ever have uncontrolled leakage of liquid stool?               |                                      |                                        |                                           |         |
| Pre-op                                                                   | 0.29 ± 0.65 (0.0) [0–3]              | –                                      | –                                         | –       |
| One month                                                                | 0.17 ± 0.57 (0.0) [0–3]              | –0.12 ± 0.59                           | –12.1 ± 59 [12]                           | 0.117   |
| Three months                                                             | 0.14 ± 0.48 (0.0) [0–2]              | –0.16 ± 0.52                           | –15.5 ± 52 [12]                           | 0.029   |
| Six months                                                               | 0.12 ± 0.50 (0.0) [0–3]              | –0.17 ± 0.57                           | –17.3 ± 57 [12]                           | 0.026   |
| Q03—Do you ever have uncontrolled anal leakage of formed stool?          |                                      |                                        |                                           |         |
| Pre-op                                                                   | 0.09 ± 0.34 (0.0) [0–3]              | –                                      | –                                         | –       |
| One month                                                                | 0.09 ± 0.47 (0.0) [0–7]              | +0.00 ± 0.42                           | +25.0 ± 150 [4]                           | 1.000   |
| Three months                                                             | 0.03 ± 0.26 (0.0) [0–9]              | –0.05 ± 0.44                           | –100 ± 0 [4]                              | 0.408   |
| Six months                                                               | 0.05 ± 0.29 (0.0) [0–9]              | –0.03 ± 0.32                           | –25 ± 96 [4]                              | 0.414   |
| Q03a—Do you have to wear pads because of anal leakage?                   |                                      |                                        |                                           |         |
| Pre-op                                                                   | 0.25 ± 0.50 (0.0) [0–1]              | –                                      | –                                         | –       |
| One month                                                                | 0.00 ± 0.00 (0.0) [0–0]              | +0.00 ± 0.00                           | NA [0]                                    | 1.000   |
| Three months                                                             | 1.00 ± NA (1.0) [1–1]                | NA                                     | NA                                        | NA      |
| Six months                                                               | 0.50 ± 0.71 (0.5) [0–1]              | –0.50 ± 0.71                           | NA [0]                                    | 0.317   |
| Q03b—Does anal leakage affect your quality of life?                      |                                      |                                        |                                           |         |
| Pre-op                                                                   | 1.25 ± 1.50 (1.0) [0–3]              | –                                      | –                                         | –       |
| One month                                                                | 0.50 ± 0.71 (0.5) [0–1]              | –0.50 ± 0.71                           | –50.0 ± NA [4]                            | 0.317   |
| Three months                                                             | 1.00 ± NA (1.0) [1–1]                | NA                                     | NA                                        | NA      |
| Six months                                                               | 0.0 ± 0.0 (0.0) [0–0]                | –1.00 ± 1.41                           | –100.0 ± NA [4]                           | 0.317   |
| Q04—When you have a bowel movement, how long are you able to hold it in? |                                      |                                        |                                           |         |
| Pre-op                                                                   | 1.83 ± 1.19 (2.0) [0–3]              | –                                      | –                                         | –       |
| One month                                                                | 2.10 ± 1.12 (3.0) [0–3]              | +0.28 ± 1.06                           | +7.6 ± 67 [48]                            | 0.053   |
| Three months                                                             | 2.19 ± 0.95 (2.0) [0–3]              | +0.36 ± 0.99                           | +21.9 ± 64 [48]                           | 0.008   |
| Six months                                                               | 2.09 ± 1.11 (3.0) [0–3]              | +0.26 ± 1.21                           | +7.3 ± 70 [48]                            | 0.119   |
| Total Wexner score                                                       |                                      |                                        |                                           |         |
| Pre-op                                                                   | 1.95 ± 2.23 (1.5) [0–3]              | –                                      | –                                         | –       |
| One month                                                                | 1.33 ± 1.91 (0.0) [0–3]              | –0.62 ± 1.95                           | –20.0 ± 90 [37]                           | 0.020   |
| Three months                                                             | 1.14 ± 1.74 (0.0) [0–3]              | –0.81 ± 2.11                           | –31.0 ± 84 [37]                           | 0.010   |
| Six months                                                               | 1.22 ± 1.58 (1.0) [0–3]              | –0.72 ± 1.98                           | –25.2 ± 80 [37]                           | 0.034   |
