# Supplementary material for: Evaluating the safety of high-intensity focused ultrasound treatment for rectal endometriosis: results from a French prospective multicentre study including 60 patients
Source: PubMed Central journal article supplement — Hum Reprod. 2024 Jun 24;39(8):1673–83. doi: 10.1093/humrep/deae127 (PMC11291952; doi:10.1093/humrep/deae127), 2024-06-24
Supplement: deae127_supplementary_table_s5.pdf [file deae127_supplementary_table_s5.pdf]

Supplementary Table S5. Evolution of constipation (KESS)—paired results (N = 58).

|                                                                                               | Score, mean ± SD (median) [range] | Difference from baseline, mean ± SD | % Change from baseline, mean ± SD [N]* | P-value |
|-----------------------------------------------------------------------------------------------|-----------------------------------|-------------------------------------|----------------------------------------|---------|
| Q01—How long have you felt constipated?                                                       |                                   |                                     |                                        |         |
| Pre-op                                                                                        | 1.59 ± 1.51 (1.0) [0–4]           | –                                   | –                                      | –       |
| One month                                                                                     | 1.41 ± 1.49 (1.0) [0–4]           | –0.17 ± 0.92                        | –12.6 ± 59 [37]                        | 0.213   |
| Three months                                                                                  | 1.43 ± 1.55 (1.0) [0–4]           | –0.16 ± 1.00                        | –3.6 ± 60 [37]                         | 0.369   |
| Six months                                                                                    | 1.48 ± 1.51 (1.0) [0–4]           | –0.10 ± 1.10                        | –6.5 ± 64 [37]                         | 0.519   |
| Q02—Do you use laxatives to pass stool?                                                       |                                   |                                     |                                        |         |
| Pre-op                                                                                        | 0.48 ± 0.71 (0.0) [0–3]           | –                                   | –                                      | –       |
| One month                                                                                     | 0.38 ± 0.56 (0.0) [0–2]           | –0.10 ± 0.52                        | –28.0 ± 51 [22]                        | 0.134   |
| Three months                                                                                  | 0.33 ± 0.51 (0.0) [0–2]           | –0.16 ± 0.53                        | –41.7 ± 46 [22]                        | 0.029   |
| Six months                                                                                    | 0.33 ± 0.57 (0.0) [0–2]           | –0.16 ± 0.62                        | –46.2 ± 56 [22]                        | 0.063   |
| Q03—What is the usual frequency of bowel movements (before the usual treatment)?              |                                   |                                     |                                        |         |
| Pre-op                                                                                        | 0.31 ± 0.50 (0.0) [0–2]           | –                                   | –                                      | –       |
| One month                                                                                     | 0.29 ± 0.50 (0.0) [0–2]           | –0.02 ± 0.44                        | –26.5 ± 56 [17]                        | 0.763   |
| Three months                                                                                  | 0.29 ± 0.53 (0.0) [0–2]           | –0.02 ± 0.48                        | –26.5 ± 66 [17]                        | 0.782   |
| Six months                                                                                    | 0.28 ± 0.45 (0.0) [0–1]           | –0.03 ± 0.42                        | –32.4 ± 47 [17]                        | 0.527   |
| Q04—Do you sometimes fail to eliminate the stool?                                             |                                   |                                     |                                        |         |
| Pre-op                                                                                        | 0.95 ± 0.83 (1.0) [0–3]           | –                                   | –                                      | –       |
| One month                                                                                     | 0.62 ± 0.67 (1.0) [0–2]           | –0.33 ± 0.71                        | –36.4 ± 49 [38]                        | 0.001   |
| Three months                                                                                  | 0.62 ± 0.72 (1.0) [0–2]           | –0.33 ± 0.89                        | –38.2 ± 57 [38]                        | 0.007   |
| Six months                                                                                    | 0.66 ± 0.72 (1.0) [0–3]           | –0.29 ± 0.79                        | –29.4 ± 50 [38]                        | 0.007   |
| Q05—Do you feel that the stool is not completely evacuated?                                   |                                   |                                     |                                        |         |
| Pre-op                                                                                        | 1.90 ± 1.12 (2.0) [0–4]           | –                                   | –                                      | –       |
| One month                                                                                     | 1.43 ± 1.11 (1.0) [0–4]           | –0.47 ± 1.06                        | –28.8 ± 44 [48]                        | 0.000   |
| Three months                                                                                  | 1.31 ± 1.03 (1.0) [0–4]           | –0.59 ± 1.04                        | –33.5 ± 45 [48]                        | 0.000   |
| Six months                                                                                    | 1.28 ± 0.99 (1.0) [0–3]           | –0.62 ± 1.01                        | –32.5 ± 43 [48]                        | 0.000   |
| Q06—Are you experiencing abdominal pain?                                                      |                                   |                                     |                                        |         |
| Pre-op                                                                                        | 2.52 ± 0.98 (3.0) [0–4]           | –                                   | –                                      | –       |
| One month                                                                                     | 1.95 ± 1.05 (2.0) [0–4]           | –0.57 ± 0.96                        | –19.6 ± 41 [56]                        | 0.000   |
| Three months                                                                                  | 1.76 ± 1.01 (2.0) [0–4]           | –0.76 ± 1.05                        | –26.0 ± 47 [56]                        | 0.000   |
| Six months                                                                                    | 1.72 ± 1.12 (2.0) [0–4]           | –0.79 ± 0.97                        | –32.6 ± 40 [56]                        | 0.000   |
| Q07—Are you experiencing bloating?                                                            |                                   |                                     |                                        |         |
| Pre-op                                                                                        | 1.45 ± 0.80 (1.0) [0–3]           | –                                   | –                                      | –       |
| One month                                                                                     | 1.28 ± 0.81 (1.0) [0–3]           | –0.17 ± 0.78                        | –4.1 ± 59 [54]                         | 0.097   |
| Three months                                                                                  | 1.21 ± 0.77 (1.0) [0–3]           | –0.24 ± 0.78                        | –10.5 ± 58 [54]                        | 0.024   |
| Six months                                                                                    | 1.16 ± 0.81 (1.0) [0–3]           | –0.29 ± 0.68                        | –16.7 ± 50 [54]                        | 0.003   |
| Q08—Do you use suppositories, enemas, or digital help?                                        |                                   |                                     |                                        |         |
| Pre-op                                                                                        | 0.29 ± 0.73 (0.0) [0–4]           | –                                   | –                                      | –       |
| One month                                                                                     | 0.28 ± 0.81 (0.0) [0–4]           | –0.02 ± 0.44                        | –16.7 ± 94 [12]                        | 0.763   |
| Three months                                                                                  | 0.19 ± 0.61 (0.0) [0–3]           | –0.10 ± 0.36                        | –52.1 ± 51 [12]                        | 0.034   |
| Six months                                                                                    | 0.28 ± 0.72 (0.0) [0–4]           | –0.02 ± 0.74                        | –30.6 ± 52 [12]                        | 0.942   |
| Q09—How much time do you spend in the bathroom when trying to pass stool?                     |                                   |                                     |                                        |         |
| Pre-op                                                                                        | 1.09 ± 0.71 (1.0) [0–2]           | –                                   | –                                      | –       |
| One month                                                                                     | 0.83 ± 0.80 (1.0) [0–3]           | –0.26 ± 0.71                        | –32.6 ± 51 [46]                        | 0.010   |
| Three months                                                                                  | 0.76 ± 0.71 (1.0) [0–3]           | –0.33 ± 0.63                        | –37.0 ± 45 [46]                        | 0.000   |
| Six months                                                                                    | 0.79 ± 0.74 (1.0) [0–3]           | –0.29 ± 0.68                        | –32.6 ± 53 [46]                        | 0.002   |
| Q10—Are you experiencing difficulty with stool evacuation, resulting in lower abdominal pain? |                                   |                                     |                                        |         |
| Pre-op                                                                                        | 1.78 ± 1.13 (2.0) [0–4]           | –                                   | –                                      | –       |
| One month                                                                                     | 1.33 ± 1.10 (1.0) [0–4]           | –0.45 ± 1.03                        | –26.2 ± 54 [49]                        | 0.002   |
| Three months                                                                                  | 1.09 ± 0.86 (1.0) [0–3]           | –0.69 ± 1.05                        | –33.5 ± 55 [49]                        | 0.000   |
| Six months                                                                                    | 1.00 ± 1.08 (1.0) [0–4]           | –0.78 ± 0.94                        | –46.1 ± 48 [49]                        | 0.000   |
| Q11—What is the stool consistency in the absence of laxatives?                                |                                   |                                     |                                        |         |
| Pre-op                                                                                        | 0.97 ± 0.99 (1.0) [0–3]           | –                                   | –                                      | –       |
| One month                                                                                     | 0.74 ± 0.91 (0.5) [0–2]           | –0.22 ± 0.84                        | –26.9 ± 64 [36]                        | 0.054   |
| Three months                                                                                  | 0.52 ± 0.71 (0.0) [0–3]           | –0.45 ± 0.94                        | –41.8 ± 54 [36]                        | 0.000   |
| Six months                                                                                    | 0.64 ± 0.72 (1.0) [0–3]           | –0.33 ± 0.98                        | –40.3 ± 45 [36]                        | 0.010   |
| Total KESS score                                                                              |                                   |                                     |                                        |         |
| Pre-op                                                                                        | 13.3 ± 6.5 (14.0) [1–28]          | –                                   | –                                      | –       |
| One month                                                                                     | 10.5 ± 6.2 (9.5) [0–26]           | –2.8 ± 4.4                          | –19.5 ± 40 [58]                        | 0.000   |
| Three months                                                                                  | 9.5 ± 5.5 (9.0) [0–22]            | –3.8 ± 4.5                          | –27.8 ± 35 [58]                        | 0.000   |
| Six months                                                                                    | 9.6 ± 6.1 (8.5) [0–27]            | –3.7 ± 4.7                          | –28.2 ± 33 [58]                        | 0.000   |

KESS, Knowles–Eccersley–Scott Symptom.
