# Supplementary material for: Evaluating the safety of high-intensity focused ultrasound treatment for rectal endometriosis: results from a French prospective multicentre study including 60 patients
Source: PubMed Central journal article supplement — Hum Reprod. 2024 Jun 24;39(8):1673–83. doi: 10.1093/humrep/deae127 (PMC11291952; doi:10.1093/humrep/deae127), 2024-06-24
Supplement: deae127_supplementary_table_s6.pdf [file deae127_supplementary_table_s6.pdf]

Supplementary Table S6. Patient perceptions of intervention and symptoms (N = 58).

|                                                                      | Patients, n (%) |
|----------------------------------------------------------------------|-----------------|
| <b>Globally, were you improved by this intervention?</b>             |                 |
| Yes, improved                                                        |                 |
| One month                                                            | 47 (81.0)       |
| Three months                                                         | 52 (89.7)       |
| Six months                                                           | 49 (84.5)       |
| <b>If you had to do this procedure again, would you do it again?</b> |                 |
| Yes, would do it again                                               |                 |
| One month                                                            | 57 (98.3)       |
| Three months                                                         | 56 (96.6)       |
| Six months                                                           | 55 (94.8)       |
| <b>Would you recommend this intervention to a friend?</b>            |                 |
| Yes, would recommend                                                 |                 |
| One month                                                            | 58 (100)        |
| Three months                                                         | 57 (98.3)       |
| Six months                                                           | 56 (96.6)       |
